# Supplementary material for: Estimates and Predictors of Mortality, Stroke Recurrence, and Functional Dependency 1‐Year after Ischemic Stroke: A Prospective Multicenter Longitudinal Cohort Study in Central Norway
Source: Hindawi journal article supplement (doi:10.1155/2024/8805152), 2024-01-01
Supplement: f1 [file 8805152.f1.pdf]

# SUPPLEMENTARY FIGURES AND TABLES

Supplementary figure S1. Patient flow chart

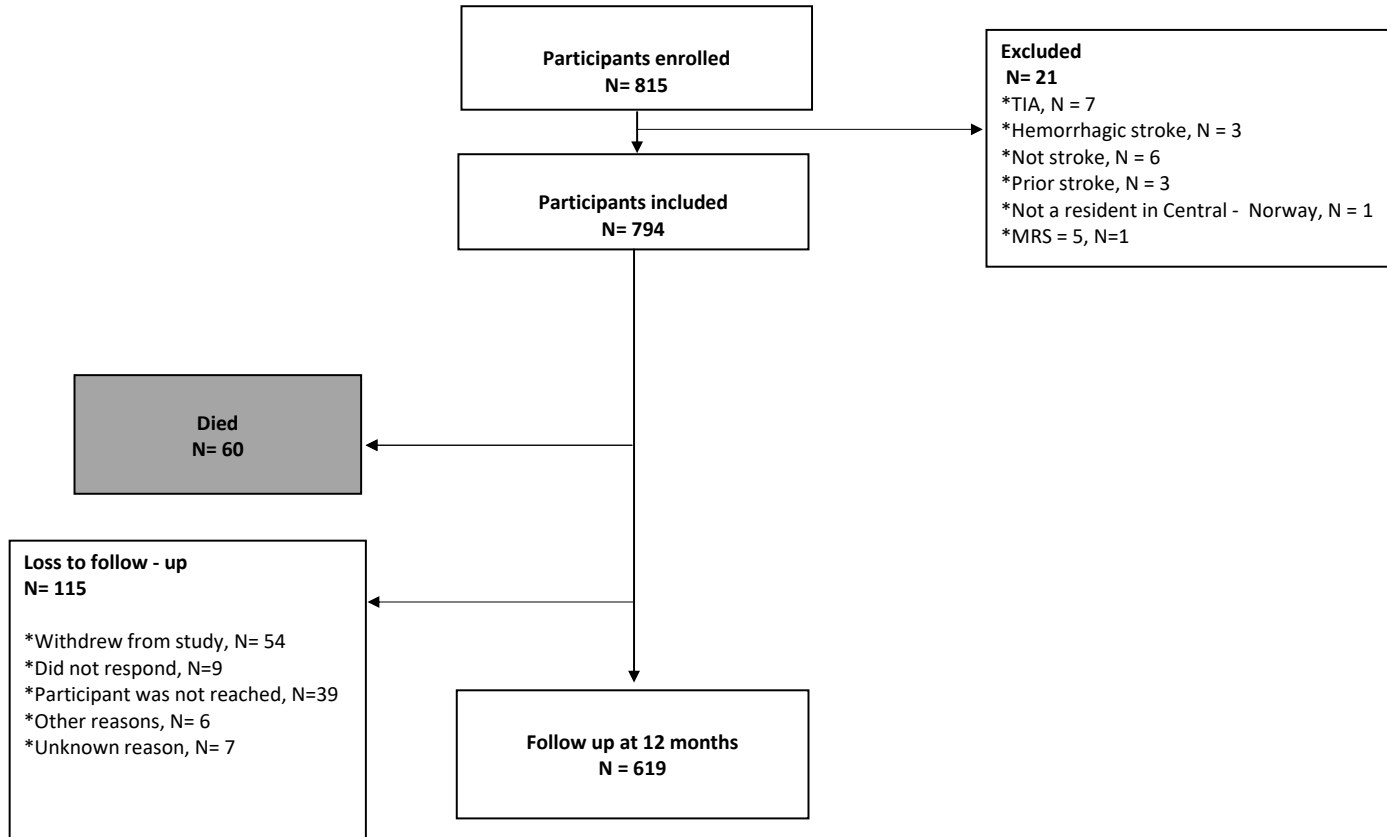

**Supplementary Table S1.** Multivariable cox proportional hazard model 1 for death including complication during hospital stay. In the multivariable models, the total number of available cases was n= 737 and events n= 54.

| Characteristic                      | Multivariable model 1 |                     |         |
|-------------------------------------|-----------------------|---------------------|---------|
|                                     | HR <sup>1</sup>       | 95% CI <sup>2</sup> | p-value |
| Age (years)                         | 1.06                  | 1.03- 1.10          | <0.001  |
| Male                                | 1.31                  | 0.72- 2.37          | 0.4     |
| Modified Rankin scale               |                       |                     |         |
| Dependent 3-4                       | 0.55                  | 0.28- 1.09          | 0.087   |
| Complications during hospital stay* | 2.61                  | 1.47- 4.63          | 0.001   |
| NIHSS Day 1 <sup>†</sup>            | 1.09                  | 1.05- 1.13          | <0.001  |
| Atrial fibrillation                 | 0.94                  | 0.52- 1.70          | 0.8     |
| Antihypertensiva                    | 0.72                  | 0.41- 1.28          | 0.3     |
| Statin therapy                      | 0.36                  | 0.19- 0.67          | 0.001   |
| Diabetes mellitus                   | 1.16                  | 0.58- 2.33          | 0.7     |
| CAD <sup>§</sup>                    | 2.84                  | 1.54- 5.23          | <0.001  |

<sup>1</sup>HR= Hazard Ratio, <sup>2</sup>CI= Confidence interval, \*Complications during hospital stay: seizures, neurological progression, falls and infections, <sup>†</sup>National Institutes of Health Stroke Scale (NIHSS), <sup>§</sup>Coronary artery disease (CAD)

**Supplementary Table S2.** Multivariable cox proportional hazard model for mortality adjusted for age, stroke severity and thrombolytic treatment.

The total number of available cases was n= 741 and events n= 55.

| <b>Characteristic</b> | <b>HR<sup>1</sup></b> | <b>95% CI<sup>1</sup></b> | <b>p-value</b> |
|-----------------------|-----------------------|---------------------------|----------------|
| Age (years)           | 1.08                  | 1.05-1.12                 | <0.001         |
| Thrombolysis          | 1.32                  | 0.73-2.41                 | 0.40           |
| NIHSS Day 1           | 1.10                  | 1.06-1.13                 | <0.001         |

<sup>1</sup>HR = Hazard Ratio, CI = Confidence interval

**Supplementary Table S3.** Multivariable cox proportional hazard model 1 for mortality with hypertension prior to stroke as predictor. The total number of available cases was n= 737 and events= 54.

| Characteristic           | Multivariable model 1 |                     |         |
|--------------------------|-----------------------|---------------------|---------|
|                          | HR <sup>1</sup>       | 95% CI <sup>2</sup> | p-value |
| Age (years)              | 1.05                  | 1.02- 1.09          | 0.004   |
| Male                     | 1.40                  | 0.77- 2.54          | 0.3     |
| Modified Rankin scale    |                       |                     |         |
| Dependent 3-4            | 0.56                  | 0.28- 1.11          | 0.10    |
| NIHSS Day 1 <sup>†</sup> | 1.09                  | 1.06- 1.12          | <0.001  |
| Atrial fibrillation      | 0.79                  | 0.43- 1.44          | 0.4     |
| Hypertension pre-stroke  | 2.54                  | 1.29- 4.98          | 0.007   |
| Statin therapy           | 0.34                  | 0.18- 0.65          | 0.001   |
| Diabetes mellitus        | 0.90                  | 0.45- 1.80          | 0.8     |
| CAD <sup>§</sup>         | 2.41                  | 1.32- 4.43          | 0.004   |

<sup>1</sup>HR= Hazard Ratio, <sup>2</sup>CI= Confidence interval, <sup>†</sup>National Institutes of Health Stroke Scale (NIHSS), <sup>§</sup>Coronary artery disease (CAD)

**Supplementary Table S4.** Descriptive data for participants (MRS 0-2 at baseline) with and without complications during hospital stay

|                                                                         | No complications during hospital stay | Complications during hospital stay |
|-------------------------------------------------------------------------|---------------------------------------|------------------------------------|
| BASELINE CHARACTERISTICS                                                | N= 556                                | N=107                              |
| <b>Age (years)</b> Mean, Median [Min, Max]                              | 70.7, 71.0 [27.0,96.0]                | 75.7, 78 [37.0, 94.0]              |
| <b>Sex - Male</b>                                                       | 337 (60.6%)                           | 50 (46.7%)                         |
| <b>STROKE CHARACTERISTICS</b>                                           |                                       |                                    |
| <b>Stroke etiology (TOAST)</b>                                          |                                       |                                    |
| Small - vessel occlusion                                                | 106 (19.1%)                           | 19 (17.8%)                         |
| Large - artery atherosclerosis                                          | 92 (16.6%)                            | 36 (33.6%)                         |
| Cardioembolism                                                          | 159 (28.6%)                           | 19 (17.8%)                         |
| Stroke of other determined etiology                                     | 51 (9.2%)                             | 8 (7.5%)                           |
| Stroke of undetermined etiology                                         | 148(26.6%)                            | 25 (23.4%)                         |
| <b>NIHSS Day 1</b> Mean, Median [Min, Max]                              | 2.4, 1.0 [0, 34.0]                    | 7.5, 4.0 [0,38.0]                  |
| Missing                                                                 | 38 (6.8%)                             | 41 (6.4%)                          |
| <b>CARDIOVASCULAR RISK FACTORS &amp; COMORBIDITIES</b>                  |                                       |                                    |
| <b>Coronary heart disease: Myocardial infarction or Angina pectoris</b> | 112 (20.1%)                           | 18 (16.8%)                         |
| <b>Atrial fibrillation</b>                                              | 102(18.4%)                            | 39 (36.5%)                         |
| <b>Diabetes mellitus</b>                                                | 91 (16.4%)                            | 25 (23.4%)                         |
| <b>Smoking status</b>                                                   |                                       |                                    |
| Current smoker                                                          | 121 (21.8%)                           | 23 (21.5%)                         |
| Missing                                                                 | 2 (0.4%)                              | 0 (0.0%)                           |
| <b>Charlson comorbidity burden</b>                                      |                                       |                                    |
| 0 - None                                                                | 238 (42.8%)                           | 36 (33.6%)                         |
| 1 - Low                                                                 | 126 (22.7%)                           | 25 (23.4%)                         |
| 2 - 3 - Moderate                                                        | 131 (23.6%)                           | 28 (26.2%)                         |
| 4 or more - High                                                        | 61 (11.0%)                            | 18 (16.8%)                         |
| <b>PATIENT CARE PARAMETERS &amp; MEDICATIONS AT DISCHARGE</b>           |                                       |                                    |
| <b>Thrombolytic therapy</b>                                             | 116 (20.9%)                           | 28 (26.2%)                         |
| <b>Antihypertensive therapy</b>                                         | 341 (61.3%)                           | 65 (60.8%)                         |
| <b>Statin therapy</b>                                                   | 502 (90.3%)                           | 83 (77.6%)                         |
| <b>Antithrombotic therapy</b>                                           | 544 (97.8%)                           | 96 (89.7%)                         |
